# hsa\_circ\_0004018 suppresses the progression of liver fibrosis through regulating the hsa-miR-660-3p/TEP1 axis

Shan Li<sup>1,\*</sup>, Fangmin Song<sup>2,\*</sup>, Xu Lei<sup>1</sup>, Jingtao Li<sup>3</sup>, Fang Li<sup>1</sup>, Huabing Tan<sup>1</sup>

<sup>1</sup>Department of Infectious Diseases and Lab of Liver Disease, Renmin Hospital, Hubei University of Medicine, Shiyan, Hubei, China

<sup>2</sup>Department of Infectious Diseases, People's Hospital of Yunxi, Shiyan, Hubei, China

<sup>3</sup>Department of Liver Diseases, The Affiliated Hospital of Shaanxi University of Chinese Medicine, Xianyang, Shaanxi, China

\*Equal contribution

**Correspondence to:** Huabing Tan, Fang Li; **email:** [tanhb\\_2013@163.com](mailto:tanhb_2013@163.com), [sylf2008@sina.com](mailto:sylf2008@sina.com)

**Keywords:** liver fibrosis, hepatic stellate cells, circular RNA, microRNA

**Received:** November 9, 2019

**Accepted:** April 17, 2020

**Published:** June 25, 2020

**Correction:** This article has been corrected. Please see Aging 2021: <https://doi.org/10.18632/aging.203218>

**Copyright:** Li et al. This is an open-access article distributed under the terms of the Creative Commons Attribution License (CC BY 3.0), which permits unrestricted use, distribution, and reproduction in any medium, provided the original author and source are credited.

## ABSTRACT

Efforts have been made in the prevention and treatment of liver fibrosis. The inhibition or depletion of the hepatic stellate cells (HSCs) has been considered as a potential approach. Recently, there are numbers of studies about the role of the circular RNA in the disease progression. However, the role of circular RNA in the regulation of HSCs and the progression of liver fibrosis remained elusive. In this study, we constructed a CCl<sub>4</sub>-induced liver fibrosis mouse model and overexpressed hsa\_circ\_0004018 in HSCs. Then, salvianolic acid B was used to treat HSCs *in vitro*. We found that hsa\_circ\_0004018 is downregulated in liver fibrogenesis. Luciferase reporter assay was performed to verify the interaction of hsa\_circ\_0004018, hsa-miR-660-3p and TEP1. It showed that hsa\_circ\_0004018 may act as a sponge of hsa-miR-660-3p, which can target and downregulate the expression of TEP1. hsa\_circ\_0004018 expressing lentivirus was used to investigate the *in-vivo* function of hsa\_circ\_0004018 in CCl<sub>4</sub>-induced liver fibrosis mice. We also reveal that the hsa\_circ\_0004018/hsa-miR-660-3p/TEP1 axis contributes to the proliferation and activation of HSCs. In addition, the overexpression of hsa\_circ\_0004018 alleviated the progression of liver fibrosis. In conclusion, our study highlights hsa\_circ\_0004018 as a potential biomarker and therapeutic target for liver fibrosis.

## INTRODUCTION

Liver fibrosis is a common feature of chronic liver injury caused by viral hepatitis, metabolic disorder, autoimmune conditions and other reasons [1]. It represents an early stage of liver cirrhosis which may develop into liver failure or liver cancer especially hepatocellular carcinoma [2]. The liver cirrhosis is estimated to lead to over 1 million deaths globally every year [3], raising it a challenge in preventing and treating the liver fibrosis at the early stage.

It has been well known that the hepatic stellate cells (HSCs) are the main source of fibrogenic cells and play a key role in the liver fibrogenesis [3, 4]. The HSCs reside

in the perisinusoidal space between hepatocytes and sinusoidal endothelial cells and act as a reserve for vitamin A in normal condition [2]. Upon liver injury, the quiescent HSCs would be activated by the cytokines, such as interleukin-6 (IL-6) [5, 6], interleukin-17 (IL-17) [7–9] and interleukin-22 (IL-22) [8, 9], secreted from the neighboring cell types within the injured liver microenvironment, including Kupffer cells, hepatocytes, sinusoidal endothelial cells, leukocytes, et cetera [6]. The activated HSCs express amounts of  $\alpha$ -smooth muscle actin ( $\alpha$ -SMA) and secret collagens and extracellular matrix (ECM) abundantly to the liver tissue interspace, resulting in liver architecture remodeling [2, 4]. As the HSCs account for 80% of total type I collagen (COL1A1) in the fibrotic liver, the HSCs inhibition with drugs like

salvianolic acid B (Sal B) is always considered as a potential therapy for liver fibrosis [2, 10, 11].

In the most recent years, a large number of studies have been done about the role of non-coding RNA (ncRNA), ranging from microRNA, long non-coding RNA (lncRNA) to circular RNA (circRNA), in the liver fibrosis and HSC activation [12–14]. Generally, the microRNAs function through interacting with the complementary mRNA targets, resulting in the degradation of the target mRNAs and the downregulation of the target genes that contribute to liver fibrosis, such as TGF- $\beta$ , PTEN,  $\beta$ -Catenin, et cetera [14]. The functions of lncRNA in the liver fibrosis and the activation of HSC seem more complex [13]. Some lncRNAs (such as MALAT1, HOTAIR, et cetera) can sponge with some microRNAs and therefore indirectly regulate the expression of their downstream target genes to regulate the process of liver fibrosis [13]. In addition, some lncRNAs (such as MALAT1 and lnc-LFAR1) can regulate the function of HSCs via interacting with the key proteins of the TGF- $\beta$  signaling pathway [13]. In contrast, the roles of circRNAs in liver fibrosis and the function of HSCs remain largely unknown, although it has been identified for a long history [15]. The classical functional mechanism of circRNAs is to interact with microRNA or other molecules to regulate the gene expression in the transcript level [16].

In our previous study, we used microarray to explore the circRNA expression profile in the fibrotic livers isolated from the mouse model (data not published), and found that hsa\_circ\_0004018 has a significant low expression in the fibrotic livers. There are few studies about the function of hsa\_circ\_0004018. A previous clinical study indicated that hsa\_circ\_0004018 might associate with the progression of hepatocellular carcinoma (HCC), but the mechanisms remained unclear [17–19]. As known, the liver fibrosis is closely associated with the progression of HCC. Without proper treatment, liver fibrosis can eventually develop into cirrhosis and HCC [20]. We hypothesize that hsa\_circ\_0004018 may contribute to the progression of HCC through directly influencing the progression of liver fibrosis. This motivates us to further reveal the role of hsa\_circ\_0004018 in the progression of liver fibrosis.

## RESULTS

### The low expression of hsa\_circ\_0004018 especially in HSCs was associated with the poor progression of liver fibrosis in mouse model

To examine the expression of hsa\_circ\_0004018 in the progression of liver fibrosis, we obtained the liver

samples from the mice injected with CCl<sub>4</sub> for 0, 30 and 45 days and detected the relative RNA levels of hsa\_circ\_0004018 by real-time PCR. We found that the severity of liver fibrosis and the serum level of IL-6 both increased over time upon CCl<sub>4</sub> injection (Figure 1A–1C), while the relative expression of hsa\_circ\_0004018 was downregulated (Figure 1D). And we further examined the expression of hsa\_circ\_0004018 in IL-6 treated HSCs, and found that the relative RNA levels of hsa\_circ\_0004018 were significantly downregulated as the HSCs were treated with IL-6 at 0, 20 and 40 ng/L for 24 hours ( $p < 0.01$ , Figure 1E)

It has been reported that salvianolic acid B (Sal B) can inhibit the progression of liver fibrosis through regulating the activation of HSCs [21–23]. We further examined the expression of hsa\_circ\_0004018 in Sal B treated HSCs, and found that the relative RNA levels of hsa\_circ\_0004018 were significantly upregulated over time as the HSCs were treated with 100  $\mu$ g/L of Sal B for 0, 3 and 6 days ( $p < 0.01$ , Figure 1F). In addition, the relative RNA levels of hsa\_circ\_0004018 significantly enhanced with the increase of Sal B concentration ( $p < 0.01$ , Figure 1G), suggesting that the low expression of hsa\_circ\_0004018, especially in HSCs, was associated with the poor progression of liver fibrosis.

### Overexpression of hsa\_circ\_0004018 suppressed the proliferation and activation of HSCs *in vitro*

To further study the role of hsa\_circ\_0004018 in HSCs, we overexpressed hsa\_circ\_0004018 in the primary HSCs (Figure 2A) and examined the proliferation of HSCs through the EDU incorporation experiment (Figure 2B). We found that the EDU incorporation levels of hsa\_circ\_0004018 overexpressed HSCs were lower than the vector control (Figure 2B, 2C). We further analyzed the effect of hsa\_circ\_0004018 overexpression on cell cycle, and found that the upregulation of hsa\_circ\_0004018 resulted in higher G0/1 phase ratio compared with the vector control ( $p < 0.01$ , Figure 2D–2F), indicating that overexpression of hsa\_circ\_0004018 could suppress the proliferation of HSCs through promoting the cell cycle arrest.

In addition, we examined the expression of  $\alpha$ -SMA and COL1A1, which reflect the activation of HSCs, in the hsa\_circ\_0004018 overexpressed and the control HSCs. We found that both RNA levels and protein levels of  $\alpha$ -SMA and COL1A1 were downregulated upon overexpression of hsa\_circ\_0004018 comparing with the control cells (Figure 2G–2K), suggesting that the overexpression of hsa\_circ\_0004018 inhibited the activation of the primary HSCs *in vitro*.

## The hsa\_circ\_0004018 acts as a sponge of hsa-miR-660-3p

The role of circular RNA as a sponge in regulation of microRNA has been well known [16]. In order to find out the potential target of hsa\_circ\_0004018, we used the Arraystar's home-made microRNA target prediction software to scan globally the matching microRNA. We found that hsa\_circ\_0004018 shares microRNA response elements (MREs) of hsa-miR-660-3p (Figure 3E), which may interact with hsa\_circ\_0004018 in HSCs.

To confirm this hypothesis, we designed the biotin labeled hsa\_circ\_0004018 probe to detect the interaction in the primary HSCs. As expected, the hsa\_circ\_0004018 probe enriched more hsa\_circ\_0004018 ( $p < 0.05$ , Figure 3A), as well as the hsa-miR-660-3p ( $p < 0.01$ , Figure 3B), than the negative control probe. Consistently, the biotin labeled hsa-miR-660-3p enriched more hsa\_circ\_0004018 than the negative control probe (Figure 3C, 3D). To further explore the function of this interaction, the luciferase plasmids containing the wild type (WT) or the MRE deleting 3' terminal (MT) of hsa\_circ\_0004018 were constructed (Figure 3E) and simultaneously co-transfected with hsa-miR-660-3p

mimic, negative control or inhibitor into the HSCs. After that, the luciferase activity of each combination was detected. It showed that the hsa-miR-660-3p mimic significantly suppressed the luciferase activity of WT ( $p < 0.05$ , Figure 3F, Column 2) but not MT (Figure 3F, Column 5). Conversely, the hsa-miR-660-3p inhibitor significantly increased the luciferase activity of WT ( $p < 0.01$ , Figure 3F, Column 3) but not MT (Figure 3F, Column 6), indicating that hsa\_circ\_0004018 functions as a sponge of hsa-miR-660-3p in HSCs.

## The hsa-miR-660-3p can promote the proliferation and activation of HSCs *in vitro*, and counteract with the function of hsa\_circ\_0004018

To explore the role of hsa-miR-660-3p in the HSCs and the progression of liver fibrosis, we firstly examined the expression of hsa-miR-660-3p in the primary HSCs isolated from the CCl<sub>4</sub>-induced liver fibrosis mice. It showed that the expression levels of hsa-miR-660-3p significantly increased over time upon CCl<sub>4</sub> injection ( $p < 0.01$  at Day 60 and  $p < 0.001$  at Day 90, Figure 4A). The transfection of hsa-miR-660-3p mimic significantly promoted the proliferation of HSCs ( $p < 0.01$ , Figure 4B, 4D), while the transfection of

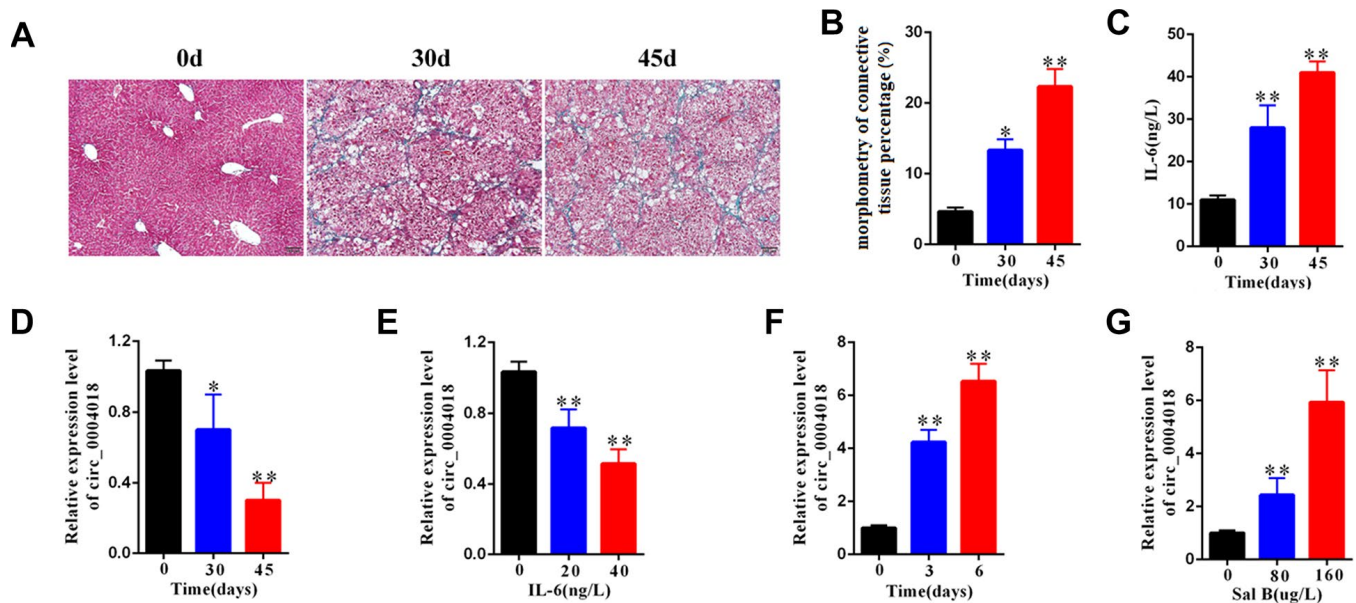

**Figure 1. The expression level of hsa\_circ\_0004018 was downregulated in mouse liver fibrosis model.** (A) The representative Masson's trichrome staining of the liver samples isolated from the liver fibrosis mice sacrificed on day 0, 30 and 45 upon injection with CCl<sub>4</sub>. Five mice were sacrificed at each time point. (B) The percentages of fibrosis area of the liver samples isolated from the liver fibrosis mice sacrificed on day 0, 30 and 45 were counted through analyzing the proportion of the blue staining area by Image J software. Three visual field of each sample were analyzed. (C) IL-6 level in serum of the liver fibrosis mice sacrificed on day 0, 30 and 45 upon injection with CCl<sub>4</sub>. (D) The relative expression levels of hsa\_circ\_0004018 of the indicated liver samples were detected by real-time PCR. (E) The relative expressions levels of hsa\_circ\_0004018 of the primary HSCs treated with IL-6 at 0, 20 and 40 ng/L for 24 hours. (F) The relative expressions levels of hsa\_circ\_0004018 of the primary HSCs treated with Sal B (100ug/L) for 0, 2 and 5 days. (G) The relative expression levels of hsa\_circ\_0004018 of the primary HSCs treated with 0, 80 and 160ug/L Sal B respectively.

inhibitor showed the inhibitory effect ( $p < 0.01$ , Figure 4C, 4E). In addition, the expression of  $\alpha$ -SMA and COL1A1 significantly increased after transfection with mimic in HSCs (Figure 4F), whereas decreased after transfection with inhibitor (Figure 4G).

We then co-transfected the mimic with hsa\_circ\_0004018 in the HSCs and examined the proliferation and activation effect. As control, the negative control or the vector was transfected in combination as indicated (Figure 4H, 4I). The HSCs co-transfected with mimic and the vector control exhibited the fastest proliferation rate (black line, Figure 4H). In compare, the proliferation of HSCs co-transfected with mimic and hsa\_circ\_0004018 was significantly slower than the mimic/vector combination (red line vs. black line, Figure 4H), but faster than the negative control/hsa\_circ\_0004018

combination (red line vs. yellow line, Figure 4H). We also examine the activation of the co-transfection HSCs, and found that the expression levels of  $\alpha$ -SMA and COL1A1 were significantly lower in the mimic/hsa\_circ\_0004018 combination than the mimic/vector combination (Lane 1 vs. Lane 4, Figure 4I), but higher than the negative control/hsa\_circ\_0004018 combination (Lane 1 vs. Lane 2, Figure 4I), indicating that hsa\_circ\_0004018 counteract with the function of hsa-miR-660-3p.

### TEP1 was validated as a bona fide target of hsa-miR-660-3p

To find out the downstream target of hsa-miR-660-3p, we used the miRBase for screening (<http://www.mirbase.org/>). As standard, the potential

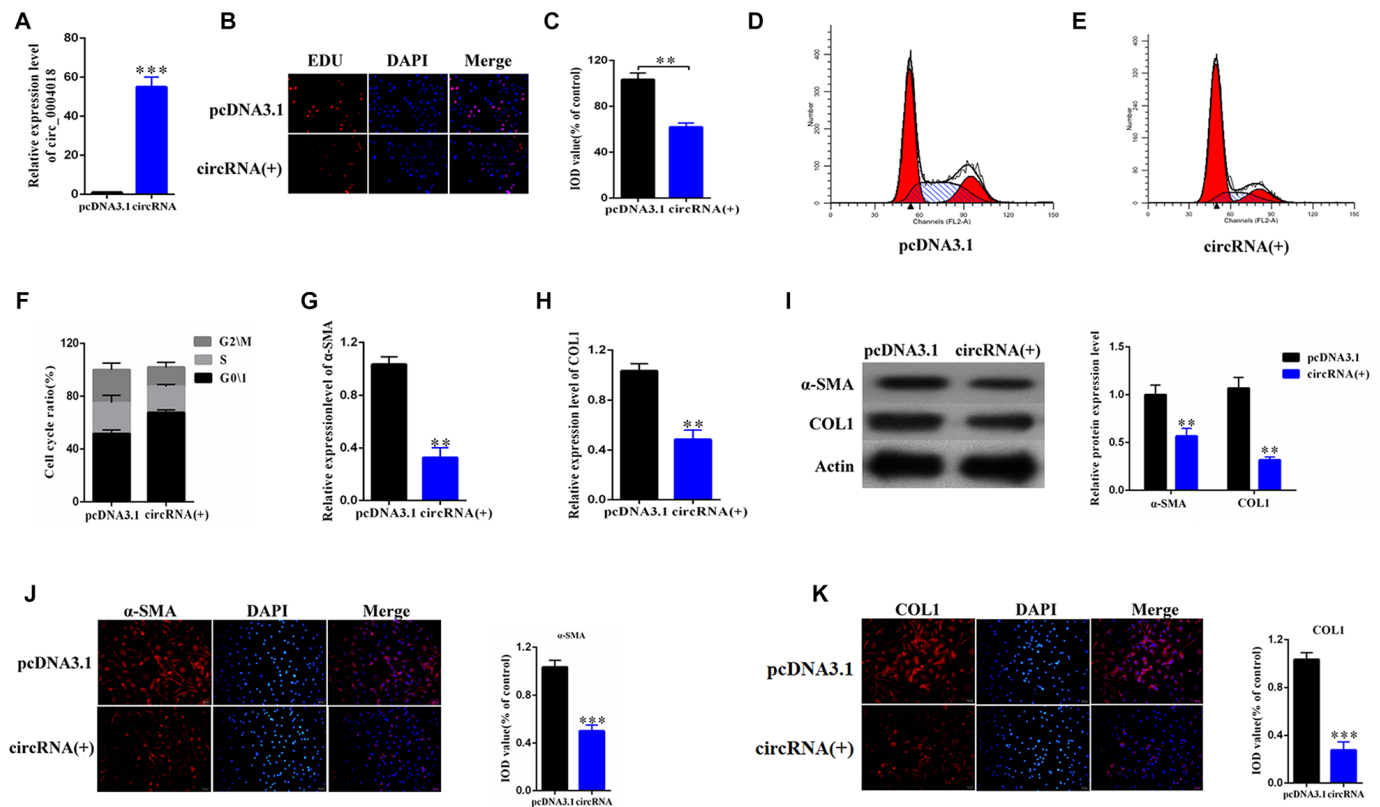

**Figure 2. The overexpression of hsa\_circ\_0004018 promoted G0/1 cell cycle arrest of the primary HSCs through upregulating the expression of  $\alpha$ -SMA and COL1A1.** (A) The relative expression levels of hsa\_circ\_0004018 were detected by real-time PCR in the overexpressed HSCs. The vector was performed as control. (B, C) The EDU incorporating levels were measured in the hsa\_circ\_0004018 overexpressed HSCs and the control cells (B). The relative IOD values of the EDU incorporating of the indicated cells were statistically analyzed and presented as columns (C). Each group was independently examined three times. (D–F) The representative cell cycle distributions of the hsa\_circ\_0004018 overexpressed HSCs (E) and the control cells (D) were analysis by FACS. The cell distribution ratios of the G0/1 phase, the S phase and the G2/M phase of the indicated cells were statistically analyzed (F). (G, H) The relative RNA levels of  $\alpha$ -SMA (G) and COL1A1 (H) of the hsa\_circ\_0004018 overexpressed HSCs and the control cells were detected by real-time PCR. (I) The expression of  $\alpha$ -SMA and COL1A1 was detected by western blotting. (J) The expression of  $\alpha$ -SMA was detected by immunofluorescence. (K) The expression of COL1A1 was detected by immunofluorescence.

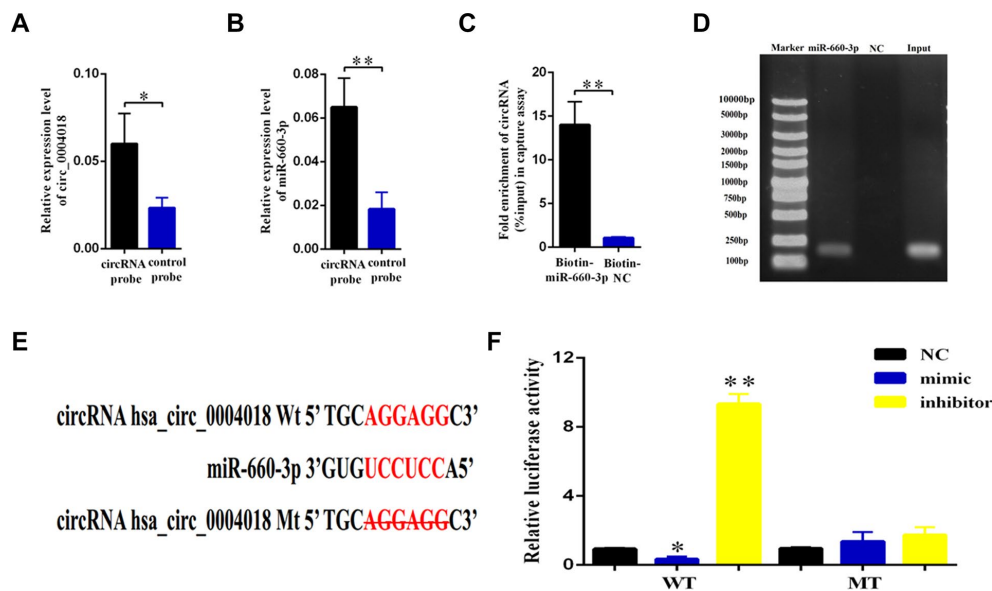

**Figure 3. Validation of hsa-miR-660-3p as the target of hsa\_circ\_0004018.** (A, B) HSCs lysate was pulled down with hsa\_circ\_0004018 specific probe, and then hsa\_circ\_0004018 (A) and hsa-miR-660-3p (B) were respectively detected by real-time PCR. (C, D) The HSCs were transfected with biotin labeled hsa-miR-660-3p and the negative control (NC) following by streptavidin enrichment, and then hsa\_circ\_0004018 was detected by real-time PCR. (E) The sequences between hsa\_circ\_0004018 and hsa-miR-660-3p were compared, and the complementary bases of red color indicate the seed sequence of hsa-miR-660-3p. The mutant hsa\_circ\_0004018 was designed without the seed sequence. (F) The HSCs stably expressing the luciferase construct containing the wild-type (WT) or mutant (MT) hsa\_circ\_0004018 were respectively transfected with hsa-miR-660-3p mimic, inhibitor and the negative control, and then the luciferase activity was examined.

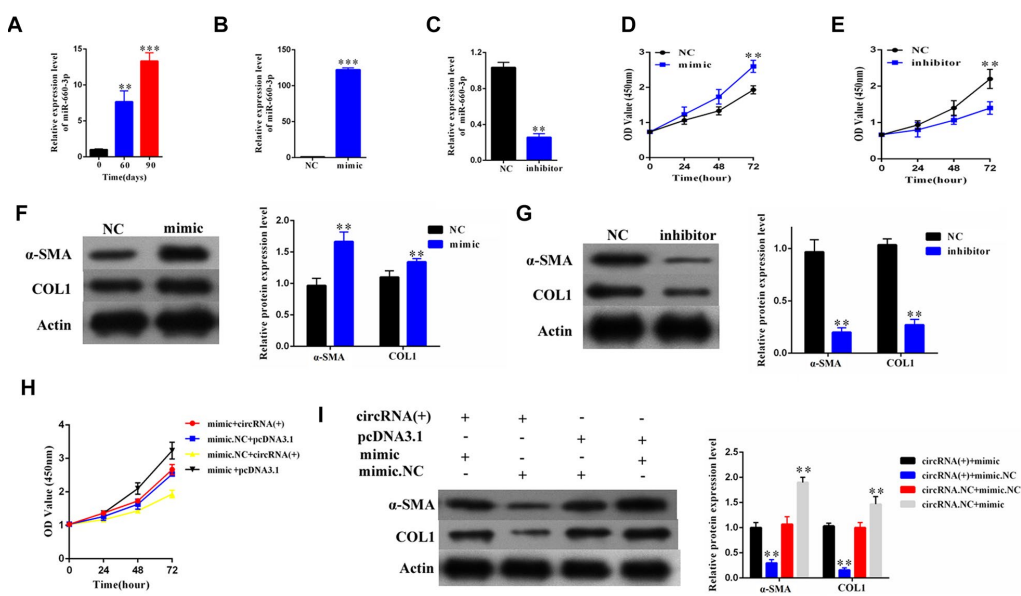

**Figure 4. The hsa-miR-660-3p can promote the proliferation and activation of HSCs *in vitro*, and counteract with the function of hsa\_circ\_0004018.** (A) It was detected the relative expression of hsa-miR-660-3p in the liver samples from CCl<sub>4</sub>-induced liver fibrosis mice sacrificed at 0, 60 and 90 days after CCl<sub>4</sub> injection. (B, C) After transfection with mimic hsa-miR-660-3p (B) and inhibitor (C), the relative expression levels of hsa-miR-660-3p in HSCs were detected by real-time PCR. (D, E) After transfection with mimic hsa-miR-660-3p (D) and inhibitor (E), the growth curves of the HSCs were examined by CCK8 assay. (F, G) After transfection with mimic hsa-miR-660-3p (F) and inhibitor (G), the expression of  $\alpha$ -SMA and COL1A1 in HSCs was detected by western blotting. (H, I) After transfection with the indicated mimic hsa-miR-660-3p or negative control (NC) plus hsa\_circ\_0004018 or the vector control, the growth curves of the HSCs were examined by CCK8 assay (H), while the expression of  $\alpha$ -SMA and COL1A1 was detected by western blotting.

gene target should harbor a similar MRE with the seed sequence of hsa-miR-660-3p and hsa\_circ\_0004018. Accordingly, we finally focused on TEPI. To confirm this, we transfected the HSCs with hsa-miR-660-3p mimic or inhibitor, and examined the expression of TEPI. It showed that the transfection of mimic resulted in an obvious decrease in both RNA and protein levels of TEPI (Figure 5A, 5C). In contrast, the transfection of inhibitor resulted in an obvious increase in both RNA and protein levels of TEPI (Figure 5B, 5D).

In further, we constructed the luciferase plasmids containing the wild type 3' UTR (WT-3'UTR) or the MRE deleting 3' UTR mutant (MT-3'UTR) of TEPI (Figure 5E). Either of these two plasmids was co-transfected with hsa-miR-660-3p mimic, negative control or inhibitor in the HSCs, and then the luciferase activity was examined. It showed that the hsa-miR-660-3p mimic significantly suppressed the luciferase activity of WT-3'UTR ( $p < 0.01$ , Figure 5F, Column 2) but not MT-3'UTR (Figure 5F, Column 5). In contrast, the hsa-miR-660-3p inhibitor significantly increased the luciferase activity of WT-3'UTR ( $p < 0.01$ , Figure 5F, Column 3) but not MT-3'UTR (Figure 5F, Column 6), indicating that TEPI is a bona fide target of hsa-miR-660-3p in HSCs.

### Overexpression of hsa\_circ\_0004018 increased the expression of TEPI, which can significantly suppress the proliferation and activation of HSCs

To explore the role of TEPI, we overexpressed TEPI in the primary HSCs (Figure 6A). We found that the upregulation of TEPI significantly inhibited the proliferation of HSCs ( $p < 0.01$ , Figure 6B), and resulted in an obvious decrease in the expression of  $\alpha$ -SMA and COL1A1 (Figure 6C).

In addition, both the RNA and protein levels of TEPI significantly increased after overexpression of hsa\_circ\_0004018 in the HSCs (Figure 6D, 6E). We further co-transfected the mimic with hsa\_circ\_0004018 in the HSCs and then examined the expression of TEPI. As control, the negative control or the vector was transfected in combination as indicated (Figure 6F, 6G). As expected, both the RNA and protein levels of TEPI of the mimic/vector combination were significantly lower than the negative control/vector combination ( $p < 0.01$ , Figure 6F, Column 1 vs. Column 2; Figure 6G, Lane 2 vs. Lane 1). In parallel, the RNA and protein levels of TEPI of the mimic/hsa\_circ\_0004018 combination were significantly lower than the negative control/hsa\_circ\_0004018 combination ( $p < 0.01$ , Figure 6F,

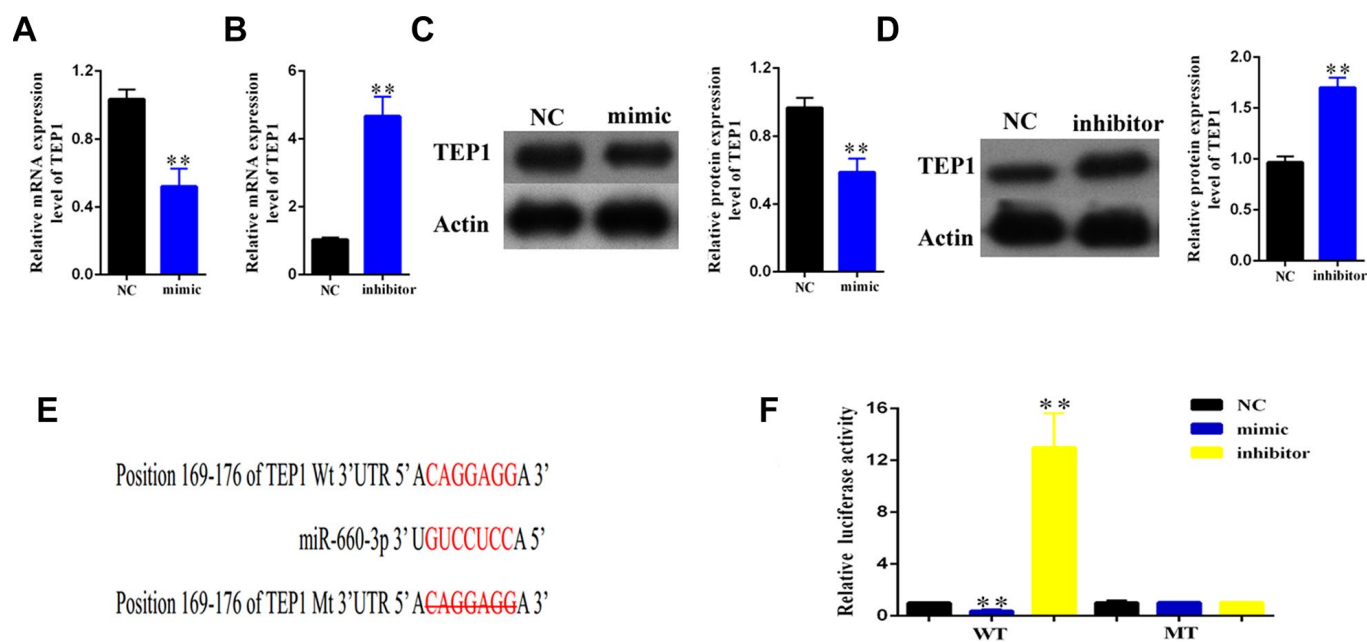

**Figure 5. Validation of TEPI as a bona fide target of hsa-miR-660-3p.** (A, B) After transfection with mimic hsa-miR-660-3p (A) and inhibitor (B), the RNA levels of TEPI were detected by real-time PCR. (C, D) After transfection with mimic hsa-miR-660-3p (C) and inhibitor (D), the expression of TEPI was detected by western blotting. (E) The sequences between TEPI 3'UTR and hsa-miR-660-3p were compared, and the complementary bases of red color indicate the seed sequence of hsa-miR-660-3p. The mutant TEPI 3'UTR was designed without the seed sequence. (F) The HSCs stably expressing the luciferase construct containing the wild-type (WT) or mutant (MT) TEPI 3'UTR were respectively transfected with hsa-miR-660-3p mimic, inhibitor and the negative control, and then the luciferase activity were examined.

Column 3 vs. Column 4; Figure 6G, Lane 3 vs. Lane 4), indicating that hsa\_circ\_0004018 and hsa-miR-660-3p counteract with each other in the regulation of TEPI.

### Overexpression of hsa\_circ\_0004018 *in vivo* alleviated the progression of CCl<sub>4</sub>-induced liver fibrosis in mouse model

To explore the therapeutic potential of hsa\_circ\_0004018 overexpression, we further transduced the hsa\_circ\_0004018 expressing lentivirus into the livers of CCl<sub>4</sub>-induced liver fibrosis mice. It showed that liver fibrosis was alleviated in the hsa\_circ\_0004018

lentivirus transduced mice comparing with the control mice (Figure 7A, 7B). In accordance with the results of the *in-vitro* experiments, the relative levels of hsa-miR-660-3p were significantly lower in the hsa\_circ\_0004018 lentivirus transduced livers than the control livers (Figure 7C), while both the RNA and protein levels of TEPI were significantly higher in the hsa\_circ\_0004018 lentivirus transduced livers than the control livers (Figure 7D, 7E). Meanwhile, the expression levels of  $\alpha$ -SMA and COL1A1 obviously decreased after transduction with hsa\_circ\_0004018 lentivirus (Figure 7F–7H), suggesting that the upregulation of hsa\_circ\_0004018 suppressed the activation of HSCs *in vivo*.

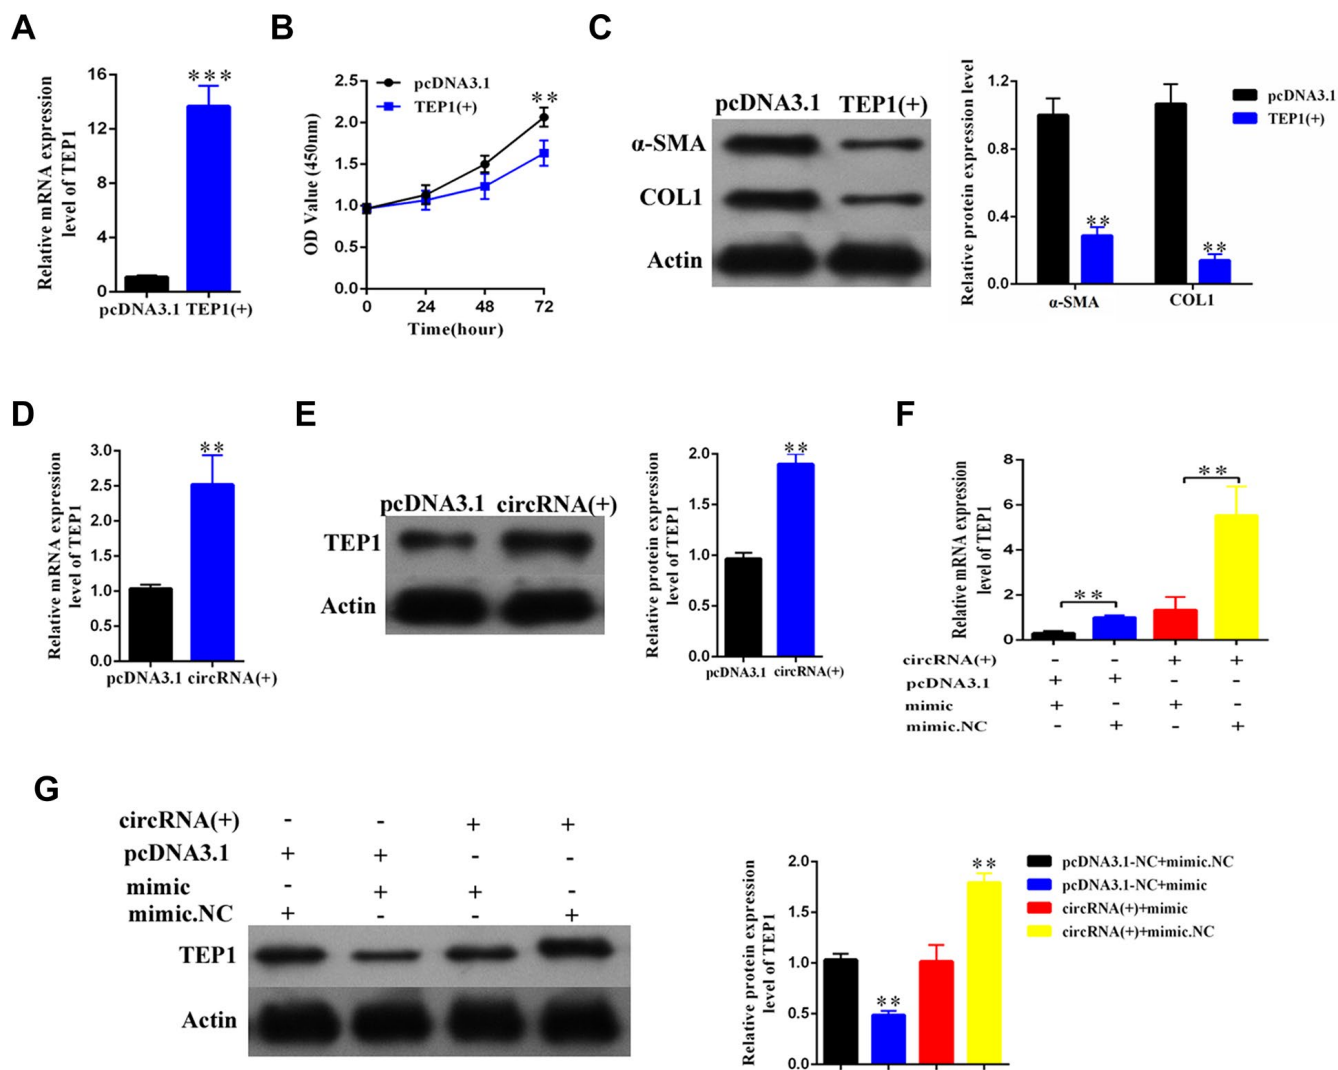

**Figure 6. The hsa\_circ\_0004018 suppressed the proliferation and activation of HSCs through upregulating the expression of TEPI.** (A) After transfection with TEPI containing plasmid and the vector control, the RNA levels of TEPI were detected by real-time PCR. The data are from three independent experiments. (B, C) After overexpression with TEPI, the growth curves of the HSCs were examined by CCK8 assay (B), while the expression of  $\alpha$ -SMA and COL1A1 in HSCs was detected by western blotting (C). (D, E) The RNA levels (D) and the protein levels (E) were respectively detected after overexpression with hsa\_circ\_0004018. The vector was transfected as control. (F, G) After transfection with the indicated mimic hsa-miR-660-3p or negative control (NC) plus hsa\_circ\_0004018 or the vector control, the RNA levels (F) and the protein levels (G) of TEPI in HSCs were respectively detected by real-time PCR and western blotting.

## DISCUSSION

There are numbers of studies implying that circular RNA may participate in the progression of diseases including cancer, diabetes etc [15]. However, little is known about the role of circular RNA in liver fibrosis. In this study, we used the CCl<sub>4</sub>-induced mouse model to explore the role of hsa\_circ\_0004018 in liver fibrogenesis, and found that the low expression of hsa\_circ\_0004018 is associated with the poor progression of liver fibrosis (Figure 1). In the previous study, it has been found that the expression hsa\_circ\_0004018 in hepatocellular carcinoma (HCC) was significantly lower than paratumorous tissue; in addition, the expression levels of hsa\_circ\_0004018 in the liver cirrhosis samples were significantly lower than HCC, exhibiting HCC-stage-specific characteristics [17]. As known, the liver fibrosis is an early stage feature of liver cirrhosis. It is possible that the continual downregulation of hsa\_circ\_0004018

significantly contributes to the transformation from liver fibrosis to HCC.

The function of circular RNA is not completely understood. Generally, circular RNA is considered to interact with microRNA and resist the function of microRNA through the microRNA response elements (MREs) [16]. Through bioinformatical screening, we further revealed that hsa\_circ\_0004018 acts as sponge of hsa-miR-660-3p, which can target and downregulate the expression of TEP1 (Figures 3, 5). Undoubtedly, there may exist other targets of hsa\_circ\_0004018 apart from hsa-miR-660-3p and other downstream targets of hsa-miR-660-3p apart from TEP1. Considering that hsa-miR-660-3p inhibitor and TEP1 overexpression reappear well the phenotypes of hsa\_circ\_0004018 downregulation (Figures 4, 6), we highlight the hsa\_circ\_0004018/hsa-miR-660-3p/TEP1 axis in the proliferation and activation of HSCs and liver fibrosis.

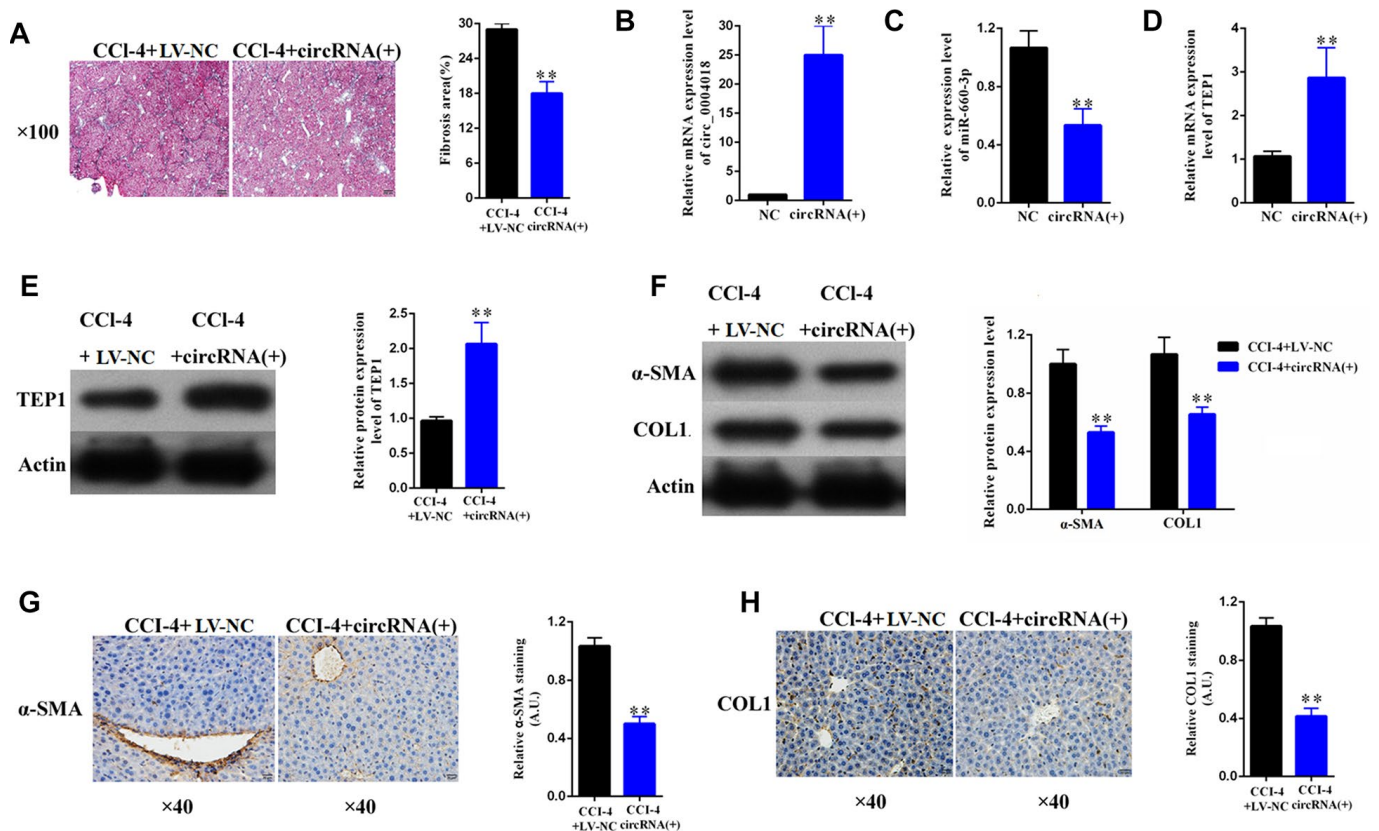

**Figure 7. Overexpression of hsa\_circ\_0004018 alleviated CCl<sub>4</sub>-induced mouse liver fibrosis through suppressing the expression of hsa-miR-660-3p and upregulating TEP1 in HSCs.** (A) The representative section staining of the liver samples isolated from the CCl<sub>4</sub>-induced liver fibrosis mice respectively injected with lentivirus expressing hsa\_circ\_0004018 (cirRNA group) or the negative control (NC group). (B, C) They were detected by real-time PCR the RNA levels of hsa\_circ\_0004018 (B) and hsa-miR-660-3p (C) in the liver samples of the cirRNA group and the NC group mice. (D, E) The RNA levels (D) and the protein levels of TEP1 (E) were respectively detected in the liver samples of the cirRNA group and the NC group mice. (F–H) It was detected the expression of α-SMA and COL1A1 in liver samples of the cirRNA group and the NC group by western blotting (F) and immunohistochemistry (G, H), respectively.



In our study, we found that telomerase-associated protein 1 (TEP1) is the downstream target of hsa-miR-660-3p. With the overexpression of hsa\_circ\_0004018, the expression of TEP1 was upregulated (Figure 6E). The telomeres are known to shorten with age and associated with increased incidence of chronic liver disease [24]. As a component of the telomerase, TEP1 can contribute to the maintenance of telomeres [25]. A number of studies have been reported that the hepatic or immune cell telomeres may associate with liver fibrosis [24]. However, the function of TEP1 in the HSCs and its role in liver fibrosis remained unknown before. In this study, we found that TEP1 overexpression suppressed the activation of HSCs *in vitro*, but the underlying mechanism still needs further study in the future.

To further test the therapeutic potential of hsa\_circ\_0004018, we transduced the hsa\_circ\_0004018 expressing lentivirus into the CCl<sub>4</sub>-induced liver fibrosis mice. It is exciting that hsa\_circ\_0004018 overexpression alleviated the progression of liver fibrosis through inhibiting the activation of HSCs (Figure 7). In conclusion, we identify here hsa\_circ\_0004018 as a promising biomarker and highlight hsa\_circ\_0004018 upregulation as a potential approach of the prevention and therapy for liver fibrosis.

## MATERIALS AND METHODS

### Plasmids

The sequence of hsa\_circ\_0004018 was obtained from CircBase (<http://circbase.org>, genome position: chr17:1703150-1704318). The cDNA of hsa\_circ\_0004018 was cloned into the pcDNA3.1(+) circRNA mini vector with EcoRI and SacI restriction sites:

(forward primer: 5'-GAATTCACACTCCAATTCTC TGCCTAC-3';  
reverse primer: 5'-GAGCTCCAAGACCAGTCTGG GCAAC-3'),

and into the pLO-ciR vector with EcoRI and NdeI restriction sites:

(forward primer: 5'-GAATTCACACTCCAATTCTC TGCCTAC-3';  
reverse primer: 5'-CATATGCAAGACCAGTCTGG GCAAC-3').

The sequence of TEP1 was obtained from NCBI (NM\_001319035). The cDNA was cloned into pcDNA3.1(+) vector with NotI and XbaI restriction sites:

(forward primer: 5'-GCGGCCGCATGGAAAACT CCATGGGC-3';

reverse primer: 5'-TCTAGATCATTCCCAATTCAG AAAGTAC-3').

All the plasmids were sequenced before use.

### Cell culture

The isolation of HSCs was referred to the previous protocol [26, 27]. Firstly, we carefully isolated the livers from the normal mice or the liver fibrosis mice. Then we digested the livers with pronase E (0.4mg/ml, Sigma Aldrich, Catalog# 1074330001)/collagenase P (1.5mg/ml, Sigma Aldrich, Catalog#11213857001) solution to make disperse cells. After being sorted by FACS, the HSCs population was collected and seeded at a density of  $2 \times 10^4$  cells/cm<sup>2</sup> in the culture plates with HSC culture medium (DMEM plus 10% FBS, 4mM L-glutamine and 1% penicillin-streptomycin solution) (DMEM: GIBCO, Catalog#11965; FBS: Biological Industry, Catalog#04-001-1A; L-glutamine: Sigma Aldrich, Catalog#G3126), and incubated in the incubator with 5% CO<sub>2</sub> at 37 °C overnight. After attachment, the cells were carefully replaced with new prewarmed medium. Since the expression of  $\alpha$ -SMA is a classical marker to positively identify HSCs upon culturing, we examined the expression of  $\alpha$ -SMA of the harvested cells by immunofluorescence with the  $\alpha$ -SMA antibody (CST, Catalog#19245, 1:500). In addition, to distinguish the HSCs from the hepatic myofibroblasts which also express  $\alpha$ -SMA, we also detected the expression of desmin and glial fibrillary acidic protein (GFAP), which have been reported to be almost absent in myofibroblasts [27–29], by immunofluorescence with desmin antibody (Abcam, Catalog#ab32362, 1:500) and GFAP antibody (Abcam, Catalog#ab7260, 1:500). We observed the expression of those markers under the confocal microscopy (Leica TCS SP5) and found that almost all (>90%) of the harvested cells co-expressed the markers of  $\alpha$ -SMA, desmin and GFAP. The HSCs used in the following experiments were all cultured for 3 days from cell attachment.

For IL-6 treatment experiments, the primary HSCs ( $1 \times 10^6$  cells/plate in 6-cm dish) from the normal mouse livers were respectively treated with 0, 20 and 40 ng/L of recombinant murine IL-6 (Peprotech, Catalog#216-16) for 24 hours. As for salvianolic acid B (Sal B) treatment experiments, the primary HSCs from the fibrotic mouse livers were treated with 100 ug/L of Sal B (Sigma, Catalog#49724) for 0, 3 and 6 days, followed by cell collection and RNA isolation. In the Sal B gradient experiment, the primary HSCs from the fibrotic mouse livers were respectively treated with 0, 80 and 160 ug/L for 3 days, followed by cell collection and RNA isolation. All the experiments were performed in triplicate.

## Immunofluorescence microscopy

For the EDU incorporation experiment, iClick™ EdU Andy Fluor™ 647 Imaging Kit (GeneCopoeia, Catalog#A006) was used. The experiment procedure was performed according to the manual of the kit. Firstly, the HSCs (transfected with hsa\_circ\_0004018 overexpressing or control plasmids) were seeded with the density of  $2 \times 10^4$  cells/cm<sup>2</sup> in the 12-well culture plates with poly-D-lysine-coated glass coverslips on the bottom. After cell attachment, the medium of those for EDU incorporation experiment was replaced with EDU containing (10 μM of the final concentration) new HSC culture medium. After incubation for 24 hours, the coverslips were collected and fixed with 4% paraformaldehyde, followed by DAPI staining and washing steps.

As for the detection of  $\alpha$ -SMA and COL1A1 expression, the coverslips seeded with the primary HSCs were harvested and fixed in 4% paraformaldehyde, followed by the IgG (CST, Catalog#2729) blocking step. Then, those IgG-blocked coverslips were stained with  $\alpha$ -SMA antibody (CST, Catalog#19245) or COL1A1 antibody (CST, Catalog# 39952) with the dilution of 1: 500, followed by secondary antibody incubation, DAPI staining and washing steps.

All the coverslips mentioned above were inverted onto the glass slides with mounting media and carefully observed and photographed under confocal microscopy (Leica TCS SP5).

## Biotin labeled probe pull down assay

The pull assay was referred to the previous study [30]. The biotin labeled hsa\_circ\_0004018 probe and hsa-miR-660-3p probe were synthesized by GeneChem. The sequence of hsa\_circ\_0004018 probe is as follows: 5'-CAGACTGGTCTTGACACTCCAATTCTCTGCCTA-3'-biotin.

The sequence of hsa-miR-660-3p probe is as follows: 5'-ACCUCUGUGUGCAUGGAUUA-3'-biotin.

For purification, about  $1 \times 10^7$  cells were collected and lysed in lysis buffer. After that, 3 μg biotin labeled probe was added to the buffer and incubated at room temperature for 4 hours. To pull down the circRNA-microRNA complex, streptavidin magnetic beads (Thermo Fisher, Catalog#88816) were added to the buffer and slowly rotated for another 4 hours, followed by washing step for 4 times. Finally, the beads were collected by centrifuge, and the binding RNA was extracted with TRIzol reagent (Thermo Fisher, Catalog#15596026) for further real-time PCR examination.

## Cell cycle analysis

We collected about  $3 \times 10^5$  HSCs of each group (hsa\_circ\_0004018 overexpression vs. vector control in triplicate) for the staining of propidium iodide according to the manufacture protocol of the cell cycle analysis kits (Beyotime, Catalog#C1052). The prepared cell suspension was analyzed by FACS (BD LSRFortessa). All the FACS data were re-analyzed by FlowJo software.

## Real-time PCR

The real-time PCR experiments were performed according the manufacture protocol (GoTaq qPCR System, Promega, Catalog#A6001) on the ABI 7500 Real-Time PCR System. Each sample were examined in triplicate from three independent experiments. The PCR primers used in this study are as follows:

**hsa\_circ\_0004018** (Forward: 5'-GAGGTCTCAATAT GTTGCCCAGACTG-3'; Reverse: 5'-GTAGTGGACGCTTGAAGA ATTTGGG-3');

**$\alpha$ -SMA** (Forward: 5'-GTCCCAGACATCA GGGAGTAA-3'; Reverse: 5'-TCGATACTTCAGC GTCAGGA-3');

**COL1A1** (Forward: 5'-GAGGGCCAAGAC GAAGACATC-3'; Reverse: 5'-CAGATCACGTCAT CGCACAAAC-3');

**TEP1** (Forward: 5'-CCACCCTCTCTAG TCTAAAGAGC-3'; Reverse: 5'-CAGCTTGCGTCATG TGAGATA-3');

**$\beta$ -Actin** (Forward: 5'-CCACCCTCTCTAG TCTAAAGAGC-3'; Reverse: 5'-CTCCTTAATGTCAC GCACGAT-3').

## Western blotting

We collected the same number of cells from each group. Cells were extracted with 1% SDS cell lysis/loading buffer. All the protein samples were subjected to electrophoresis by SDS-PAGE method and then transferred to PVDF membrane for further immunoblot. The primary antibodies used in this study include:  $\alpha$ -SMA antibody (CST, Catalog#19245, 1:1000), COL1A1 antibody (CST, Catalog# 39952, 1:1000), TEP1 antibody (Abcam, Catalog#ab64189, 1:1000),  $\beta$ -actin antibody (CST, Catalog#3700T, 1:3000). The blots were exposed using chemiluminescence and photographed by Tannon 3500 Imager. Photos were analyzed by ImageJ software.

### Cell proliferation assay (CCK8 assay)

For this assay, we cultured  $1 \times 10^3$  cells per wells on 96-well plates and examined the cell numbers in each well using the Cell Counting Kit (CCK8, Dojindo, Catalog#CK04) at 24, 48 and 72 hours. Each group of cells was examined in triplicate. The OD value was determined by Microplate Absorbance Reader (Bio-rad, iMark™).

### Luciferase reporter assay

This assay was referred to the protocol of the previous study [31]. A 200bp fragment of hsa\_circ\_0004018 3' terminal or TEPI 3'UTR was inserted into the 3' terminal of the luciferase gene in pGL3 vector (pGL3-3') and sequenced before use. About  $1 \times 10^5$  cells were seeded in 48-well plate before transfection. After attachment, the cells of each well were respectively transfected with 320 ng of pGL3-3' and 30 ng of pRL-TK containing Renilla luciferase plus hsa-miR-660-3p mimic (original sequence: 5'-ACCUCCUGUGUCA UGGAUUA-3'), mimic negative control or inhibitor (GenePharma) using Lipfatamin 2000 (Invitrogen, Catalog#11668019). 48 hours after transfection, the relative luciferase absorbance value of each group was examined by Dual-Luciferase Reporter Assay System (Promega, Catalog#E1910) and normalized to Renilla luciferase absorbance value. Each group was performed in triplicate from three independent experiments.

### Lentivirus *in-vivo* administration

The lentivirus expressing hsa\_circ\_0004018 or negative control was purchased from GeneChem. Lentivirus solution was injected via the tail vein (about  $5 \times 10^8$  units of each mouse) twice respectively at the first and the second week of CCl<sub>4</sub> injection (once a week for 4 weeks). All groups of mice were sacrificed at the end of 4 weeks for further pathological examination.

### Immunohistochemistry

The liver tissue samples collected from the model and the control mice were fixed in 4% paraformaldehyde overnight at room temperature. Following with the steps of dehydration, embedding in paraffin, the samples were sliced into 5-8μm thickness and transferred onto glass slides. The sections were then immunostained with α-SMA and COL1A1 primary antibody at 4 °C overnight and then incubated with biotinylated secondary antibody. After incubation with Sav-HRP conjugates, the sections were applied with DAB substrate for color development and observed under microscopy.

### CCl<sub>4</sub>-induced liver fibrosis mouse model

The liver fibrosis mouse model was established referring to the previous report [32]. C57BL/6 male mice of 6-8 weeks old and  $20 \pm 2$  g in weight were supplied by the Experimental Animal Center of Hubei University of Medicine. Each mouse was treated with 2 ml of CCl<sub>4</sub> (Sinopharm Chemical Reagent Co., Catalog# 10006480)/olive oil (1:1, v/v) per kg body weight by intraperitoneal injection twice for 6 weeks. Mice injected with equal volume of olive oil were performed as control.

All the mice used in this study were under human care and provided with enough food and water. When it came to the end of each experimental point, those mice were euthanatized with CO<sub>2</sub>. All the experiments were approved and supervised by the Animal Welfare and Ethics Committee of Renmin Hospital, Hubei University of Medicine.

### Masson's trichrome staining and the morphometry

The liver samples were isolated from the liver fibrosis mice sacrificed on day 0, 30 and 45 upon injection with CCl<sub>4</sub> and then fixed in 4% paraformaldehyde and embedded in paraffin, followed by frozen section. For the Masson's trichrome staining of the liver sections, Trichrome Stain Kit (Abcam, Catalog#ab150686) was used. Briefly, the sections were firstly deparaffinized and rehydrated in distilled water. Then, the sections were incubated successively with preheated Bouin's Fluid, Weigert's Iron Hematoxylin, Biebrich Scarlet/Acid Fuchsin solution, phosphomolybdic/phosphotungstic acid solution, Aniline Blue solution and acetic acid solution, with rinse steps at the interval of every two incubation steps. The duration of each incubation step was controlled according to the recommendatory procedures of the manual. The stained sections were then carefully observed and photographed under microscope (Olympus). The proportion of each staining area was analyzed by ImageJ software. The blue staining area represents the collagen-enriched tissues, which was considered as the fibrosis area of the livers.

### Statistical analysis

All the data were analyzed using SPSS software. Student's t test was used to compare the difference of data between groups.  $P < 0.05$  represents significant difference. The asterisks \*, \*\* and \*\*\* stand for  $p < 0.05$ ,  $p < 0.01$  and  $p < 0.001$ , respectively.

### Data availability statement

The datasets used in the current study are available from the corresponding author on reasonable request.

## AUTHOR CONTRIBUTIONS

HT and FL designed the study. SL and FS performed the experiments. XL and JL participated in the data analysis. SL wrote the manuscript. HT revised the manuscript. All authors approved the final proof.

## CONFLICTS OF INTEREST

All of the contributing authors declared no conflicts of interest.

## FUNDING

This study was supported by the Innovative Research Program for Graduates of Hubei University of Medicine.

## REFERENCES

1. Puche JE, Saiman Y, Friedman SL. Hepatic stellate cells and liver fibrosis. *Compr Physiol*. 2013; 3:1473–92. <https://doi.org/10.1002/cphy.c120035> PMID:24265236
2. Zhang CY, Yuan WG, He P, Lei JH, Wang CX. Liver fibrosis and hepatic stellate cells: etiology, pathological hallmarks and therapeutic targets. *World J Gastroenterol*. 2016; 22:10512–22. <https://doi.org/10.3748/wjg.v22.i48.10512> PMID:28082803
3. Higashi T, Friedman SL, Hoshida Y. Hepatic stellate cells as key target in liver fibrosis. *Adv Drug Deliv Rev*. 2017; 121:27–42. <https://doi.org/10.1016/j.addr.2017.05.007> PMID:28506744
4. Tsuchida T, Friedman SL. Mechanisms of hepatic stellate cell activation. *Nat Rev Gastroenterol Hepatol*. 2017; 14:397–411. <https://doi.org/10.1038/nrgastro.2017.38> PMID:28487545
5. Xiang DM, Sun W, Ning BF, Zhou TF, Li XF, Zhong W, Cheng Z, Xia MY, Wang X, Deng X, Wang W, Li HY, Cui XL, et al. The HLF/IL-6/STAT3 feedforward circuit drives hepatic stellate cell activation to promote liver fibrosis. *Gut*. 2018; 67:1704–15. <https://doi.org/10.1136/gutjnl-2016-313392> PMID:28754776
6. Kagan P, Sultan M, Tachlytski I, Safran M, Ben-Ari Z. Both MAPK and STAT3 signal transduction pathways are necessary for IL-6-dependent hepatic stellate cells activation. *PLoS One*. 2017; 12:e0176173. <https://doi.org/10.1371/journal.pone.0176173> PMID:28472150
7. Wree A, McGeough MD, Inzaugarat ME, Eguchi A, Schuster S, Johnson CD, Peña CA, Geisler LJ, Papouchado BG, Hoffman HM, Feldstein AE. NLRP3 inflammasome driven liver injury and fibrosis: roles of IL-17 and TNF in mice. *Hepatology*. 2018; 67:736–49. <https://doi.org/10.1002/hep.29523> PMID:28902427
8. Molina MF, Abdelnabi MN, Fabre T, Shoukry NH. Type 3 cytokines in liver fibrosis and liver cancer. *Cytokine*. 2019; 124:154497. <https://doi.org/10.1016/j.cyto.2018.07.028> PMID:30097286
9. Fabre T, Molina MF, Soucy G, Goulet JP, Willems B, Villeneuve JP, Bilodeau M, Shoukry NH. Type 3 cytokines IL-17A and IL-22 drive TGF- $\beta$ -dependent liver fibrosis. *Sci Immunol*. 2018; 3:eaar7754. <https://doi.org/10.1126/sciimmunol.aar7754> PMID:30366940
10. Chen Y, Ping J, Xu L, Ye Q, Li M. Chemically modified hepatic stellate cell selective carrier mannose-6-phosphate carrying salvianolic acid B alleviates liver fibrosis in vivo. *Basic Clin Pharmacol Toxicol*. 2019. [Epub ahead of print] <https://doi.org/10.1111/bcpt.13360> PMID:31709714
11. Zhang W, Ping J, Zhou Y, Chen G, Xu L. Salvianolic acid B inhibits activation of human primary hepatic stellate cells through downregulation of the myocyte enhancer factor 2 signaling pathway. *Front Pharmacol*. 2019; 10:322. <https://doi.org/10.3389/fphar.2019.00322> PMID:31031620
12. Yang JJ, Tao H, Deng ZY, Lu C, Li J. Non-coding RNA-mediated epigenetic regulation of liver fibrosis. *Metabolism*. 2015; 64:1386–94. <https://doi.org/10.1016/j.metabol.2015.08.004> PMID:26362725
13. Peng H, Wan LY, Liang JJ, Zhang YQ, Ai WB, Wu JF. The roles of lncRNA in hepatic fibrosis. *Cell Biosci*. 2018; 8:63. <https://doi.org/10.1186/s13578-018-0259-6> PMID:30534359
14. Riaz F, Li D. Non-coding RNA associated competitive endogenous RNA regulatory network: novel therapeutic approach in liver fibrosis. *Curr Gene Ther*. 2019; 19:305–17. <https://doi.org/10.2174/1566523219666191107113046> PMID:31696817
15. Salzman J. Circular RNA expression: its potential regulation and function. *Trends Genet*. 2016; 32:309–16.

- <https://doi.org/10.1016/j.tig.2016.03.002>  
PMID:[27050930](https://pubmed.ncbi.nlm.nih.gov/27050930/)
16. Hansen TB, Jensen TI, Clausen BH, Bramsen JB, Finsen B, Damgaard CK, Kjems J. Natural RNA circles function as efficient microRNA sponges. *Nature*. 2013; 495:384–88.  
<https://doi.org/10.1038/nature11993>  
PMID:[23446346](https://pubmed.ncbi.nlm.nih.gov/23446346/)
17. Fu L, Yao T, Chen Q, Mo X, Hu Y, Guo J. Screening differential circular RNA expression profiles reveals hsa\_circ\_0004018 is associated with hepatocellular carcinoma. *Oncotarget*. 2017; 8:58405–16.  
<https://doi.org/10.18632/oncotarget.16881>  
PMID:[28938566](https://pubmed.ncbi.nlm.nih.gov/28938566/)
18. Fu L, Jiang Z, Li T, Hu Y, Guo J. Circular RNAs in hepatocellular carcinoma: functions and implications. *Cancer Med*. 2018; 7:3101–09.  
<https://doi.org/10.1002/cam4.1574>  
PMID:[29856133](https://pubmed.ncbi.nlm.nih.gov/29856133/)
19. Hu J, Li P, Song Y, Ge YX, Meng XM, Huang C, Li J, Xu T. Progress and prospects of circular RNAs in hepatocellular carcinoma: novel insights into their function. *J Cell Physiol*. 2018; 233:4408–22.  
<https://doi.org/10.1002/jcp.26154>  
PMID:[28833094](https://pubmed.ncbi.nlm.nih.gov/28833094/)
20. Liu W, Li X, Zheng W, Yao R, Zheng J. Preoperative evaluation of the degree of liver fibrosis based on matter-element analysis using serological indicators in patients with hepatocellular carcinoma. *Biosci Trends*. 2019; 13:70–76.  
<https://doi.org/10.5582/bst.2018.01311>  
PMID:[30867373](https://pubmed.ncbi.nlm.nih.gov/30867373/)
21. Li S, Wang L, Yan X, Wang Q, Tao Y, Li J, Peng Y, Liu P, Liu C. Salvianolic acid B attenuates rat hepatic fibrosis via downregulating angiotensin II signaling. *Evid Based Complement Alternat Med*. 2012; 2012:160726.  
<https://doi.org/10.1155/2012/160726>  
PMID:[23243430](https://pubmed.ncbi.nlm.nih.gov/23243430/)
22. Liu P, Hu YY, Liu C, Zhu DY, Xue HM, Xu ZQ, Xu LM, Liu CH, Gu HT, Zhang ZQ. Clinical observation of salvianolic acid B in treatment of liver fibrosis in chronic hepatitis B. *World J Gastroenterol*. 2002; 8:679–85.  
<https://doi.org/10.3748/wjg.v8.i4.679>  
PMID:[12174378](https://pubmed.ncbi.nlm.nih.gov/12174378/)
23. Wang L, Tao Y, Li S, Chen G, Liu C. [Effects of salvianolic acid B on lipid peroxidation and metalloproteinase-2 activity in fibrotic liver in rat]. *Zhongguo Zhong Yao Za Zhi*. 2010; 35:71–75.  
PMID:[20349720](https://pubmed.ncbi.nlm.nih.gov/20349720/)
24. Barnard A, Moch A, Saab S. Relationship between telomere maintenance and liver disease. *Gut Liver*. 2019; 13:11–15.  
<https://doi.org/10.5009/gnl18081>  
PMID:[30400735](https://pubmed.ncbi.nlm.nih.gov/30400735/)
25. Harrington L, McPhail T, Mar V, Zhou W, Oulton R, Bass MB, Arruda I, Robinson MO. A mammalian telomerase-associated protein. *Science*. 1997; 275:973–77.  
<https://doi.org/10.1126/science.275.5302.973>  
PMID:[9020079](https://pubmed.ncbi.nlm.nih.gov/9020079/)
26. Mederacke I, Dapito DH, Affò S, Uchinami H, Schwabe RF. High-yield and high-purity isolation of hepatic stellate cells from normal and fibrotic mouse livers. *Nat Protoc*. 2015; 10:305–15.  
<https://doi.org/10.1038/nprot.2015.017>  
PMID:[25612230](https://pubmed.ncbi.nlm.nih.gov/25612230/)
27. Chang W, Yang M, Song L, Shen K, Wang H, Gao X, Li M, Niu W, Qin X. Isolation and culture of hepatic stellate cells from mouse liver. *Acta Biochim Biophys Sin (Shanghai)*. 2014; 46:291–98.  
<https://doi.org/10.1093/abbs/gmt143> PMID:[24389643](https://pubmed.ncbi.nlm.nih.gov/24389643/)
28. Iwaisako K, Jiang C, Zhang M, Cong M, Moore-Morris TJ, Park TJ, Liu X, Xu J, Wang P, Paik YH, Meng F, Asagiri M, Murray LA, et al. Origin of myofibroblasts in the fibrotic liver in mice. *Proc Natl Acad Sci USA*. 2014; 111:E3297–305.  
<https://doi.org/10.1073/pnas.1400062111>  
PMID:[25074909](https://pubmed.ncbi.nlm.nih.gov/25074909/)
29. Weiskirchen S, Tag CG, Sauer-Lehnen S, Tacke F, Weiskirchen R. Isolation and culture of primary murine hepatic stellate cells. *Methods Mol Biol*. 2017; 1627:165–91.  
[https://doi.org/10.1007/978-1-4939-7113-8\\_11](https://doi.org/10.1007/978-1-4939-7113-8_11)  
PMID:[28836201](https://pubmed.ncbi.nlm.nih.gov/28836201/)
30. Wei J, Wu J, Xu W, Nie H, Zhou R, Wang R, Liu Y, Tang G, Wu J. Salvianolic acid B inhibits glycolysis in oral squamous cell carcinoma via targeting PI3K/AKT/HIF-1 $\alpha$  signaling pathway. *Cell Death Dis*. 2018; 9:599.  
<https://doi.org/10.1038/s41419-018-0623-9>  
PMID:[29789538](https://pubmed.ncbi.nlm.nih.gov/29789538/)
31. Shimono Y, Zabala M, Cho RW, Lobo N, Dalerba P, Qian D, Diehn M, Liu H, Panula SP, Chiao E, Dirbas FM, Somlo G, Pera RA, et al. Downregulation of miRNA-200c links breast cancer stem cells with normal stem cells. *Cell*. 2009; 138:592–603.  
<https://doi.org/10.1016/j.cell.2009.07.011>  
PMID:[19665978](https://pubmed.ncbi.nlm.nih.gov/19665978/)
32. Ma W, Tao L, Zhang W, Zhu Y, Xue D, Zhang J, Liu C. Xia-yu-xue decoction inhibits intestinal epithelial cell apoptosis in CCl4-induced liver fibrosis. *Cell Physiol Biochem*. 2017; 44:333–44.  
<https://doi.org/10.1159/000484904>  
PMID:[29132134](https://pubmed.ncbi.nlm.nih.gov/29132134/)
